# Supplementary material for: Remoteness and maternal and child health service utilization in rural Liberia: A population–based survey
Source: PubMed Central journal article supplement (PMC4512264; doi:10.7189/jogh.05.020401), 2015-12
Supplement: jogh-05-020401-s001.pdf [file jogh-05-020401-s001.pdf]

## Online Supplementary Document

Kenny et al. Remoteness and maternal and child health service utilization in rural Liberia: A population-based survey  
J Glob Health 2015;5:020401

| <b>Table s1. Healthcare Source Definitions</b>                                                        |                                             |
|-------------------------------------------------------------------------------------------------------|---------------------------------------------|
| <u>Category</u>                                                                                       | <u>Source</u>                               |
| Formal biomedical providers*                                                                          | Doctor                                      |
|                                                                                                       | Nurse                                       |
|                                                                                                       | Midwife                                     |
|                                                                                                       | Other medical provider at a health facility |
| Informal biomedical providers                                                                         | Tablet man or black bagger                  |
|                                                                                                       | Private pharmacy                            |
| Traditional providers                                                                                 | Country doctor or zoe                       |
|                                                                                                       | Traditional midwife                         |
| *At the time of the survey, there were no community health workers active in the surveyed population. |                                             |

| <b>Table s2. Maternal Health Service Utilization: Univariable Analyses</b> |                                  |        |                                  |        |                                |       |                                            |      |                              |        |
|----------------------------------------------------------------------------|----------------------------------|--------|----------------------------------|--------|--------------------------------|-------|--------------------------------------------|------|------------------------------|--------|
|                                                                            | <u>Antenatal Clinic Visit 1+</u> |        | <u>Antenatal Clinic Visit 4+</u> |        | <u>Facility-Based Delivery</u> |       | <u>PNC from a Formal Healthcare Worker</u> |      | <u>Full Maternal Cascade</u> |        |
|                                                                            | Univariable                      |        | Univariable                      |        | Univariable                    |       | Univariable                                |      | Univariable                  |        |
|                                                                            | Odds Ratio                       | p      | Odds Ratio                       | p      | Odds Ratio                     | p     | Odds Ratio                                 | p    | Odds Ratio                   | p      |
|                                                                            | (95%CI)                          |        | (95% CI)                         |        | (95% CI)                       |       | (95% CI)                                   |      | (95% CI)                     |        |
| Distance Quartile                                                          |                                  |        |                                  |        |                                |       |                                            |      |                              |        |
| Closest                                                                    | Ref.                             | Ref.   | Ref.                             | Ref.   | Ref.                           | Ref.  | Ref.                                       | Ref. | Ref.                         | Ref.   |
| Second                                                                     | 0.34<br>(0.15-0.78)              | 0.01   | 0.65<br>(0.40-1.04)              | 0.07   | 1.32<br>(0.88-1.98)            | 0.18  | 1.05<br>(0.68-1.64)                        | 0.81 | 0.89<br>(0.56-1.41)          | 0.62   |
| Third                                                                      | 0.27<br>(0.11-0.64)              | 0.005  | 0.60<br>(0.36-1.00)              | 0.05   | 2.25<br>(1.32-3.86)            | 0.004 | 1.19<br>(0.76-1.87)                        | 0.44 | 0.74<br>(0.44-1.26)          | 0.26   |
| Farthest                                                                   | 0.06<br>(0.03-0.14)              | <0.001 | 0.13<br>(0.08-0.23)              | <0.001 | 0.50<br>(0.29-0.85)            | 0.01  | 0.55<br>(0.30-0.99)                        | 0.05 | 0.17<br>(0.08-0.39)          | <0.001 |
| Moto path                                                                  | 2.41<br>(1.35-4.30)              | 0.004  | 1.57<br>(1.04-2.38)              | 0.03   | 2.18<br>(1.32-3.62)            | 0.004 | 1.05<br>(0.68-1.63)                        | 0.82 | 1.16<br>(0.73-1.86)          | 0.52   |
| Gold mining village                                                        | 1.04<br>(0.60-1.80)              | 0.88   | 1.04<br>(0.66-1.64)              | 0.85   | 2.28<br>(1.41-3.70)            | 0.001 | 1.15<br>(0.76-1.73)                        | 0.50 | 0.83<br>(0.51-1.35)          | 0.43   |
| Maternal age                                                               | 0.99<br>(0.97-1.01)              | 0.31   | 1.01<br>(0.99-1.03)              | 0.24   | 0.98<br>(0.96-1.00)            | 0.07  | 1.00<br>(0.98-1.02)                        | 0.89 | 1.01<br>(0.98-1.03)          | 0.58   |
| Married mother                                                             | 1.35<br>(0.79-2.29)              | 0.26   | 1.55<br>(0.93-2.61)              | 0.09   | 1.55<br>(0.92-2.60)            | 0.10  | 1.80<br>(1.08-3.01)                        | 0.03 | 1.33<br>(0.74-2.38)          | 0.32   |
| Refugee                                                                    | 0.64<br>(0.36-1.12)              | 0.11   | 0.43<br>(0.25-0.77)              | 0.005  | 0.94<br>(0.51-1.75)            | 0.84  | 1.22<br>(0.62-2.40)                        | 0.55 | 0.56<br>(0.26-1.22)          | 0.14   |
| Maternal Education                                                         |                                  |        |                                  |        |                                |       |                                            |      |                              |        |
| None                                                                       | Ref.                             | Ref.   | Ref.                             | Ref.   | Ref.                           | Ref.  | Ref.                                       | Ref. | Ref.                         | Ref.   |
| Primary                                                                    | 1.63<br>(1.11-2.40)              | 0.01   | 1.53<br>(1.02-2.28)              | 0.04   | 1.37<br>(0.93-2.00)            | 0.11  | 1.16<br>(0.78-1.74)                        | 0.45 | 0.98<br>(0.63-1.51)          | 0.92   |
| Any Secondary                                                              | 1.97<br>(0.97-4.02)              | 0.06   | 2.24<br>(1.25-4.02)              | 0.009  | 2.73<br>(1.50-4.98)            | 0.002 | 1.45<br>(0.80-2.63)                        | 0.21 | 1.41<br>(0.75-2.66)          | 0.27   |

Abbreviations. PNC: Postnatal care.

**Table s3. Child Health Care Seeking from a Recommended Provider: Univariable Analyses**

|                     | <u>Fever Care Seeking from Facility</u> |        | <u>ARI Care Seeking from Formal HCW</u> |       | <u>Diarrhea Care Seeking from Formal or Informal Biomedical Provider</u> |       | <u>Deworming Treatment</u> |        |
|---------------------|-----------------------------------------|--------|-----------------------------------------|-------|--------------------------------------------------------------------------|-------|----------------------------|--------|
|                     | Univariable OR (95% CI)                 | p      | Univariable OR (95% CI)                 | p     | Univariable OR (95% CI)                                                  | p     | Univariable OR (95%CI)     | p      |
| Distance Quartile   |                                         |        |                                         |       |                                                                          |       |                            |        |
| Closest             | Ref.                                    | Ref.   | Ref.                                    | Ref.  | Ref.                                                                     | Ref.  | Ref.                       | Ref.   |
| Second              | 0.43 (0.21-0.90)                        | 0.03   | 0.41 (0.12-1.40)                        | 0.15  | 2.16 (0.99-4.71)                                                         | 0.05  | 0.88 (0.43-1.82)           | 0.73   |
| Third               | 0.22 (0.09-0.51)                        | 0.001  | 0.08 (0.01-0.41)                        | 0.004 | 1.78 (0.77-4.16)                                                         | 0.17  | 0.92 (0.41-2.04)           | 0.83   |
| Farthest            | 0.13 (0.05-0.38)                        | <0.001 | 0.07 (0.01-0.55)                        | 0.01  | 0.73 (0.32-1.70)                                                         | 0.46  | 0.22 (0.11-0.45)           | <0.001 |
| Moto path           | 0.70 (0.35-1.38)                        | 0.29   | 0.81 (0.25-2.64)                        | 0.72  | 1.85 (0.95-3.61)                                                         | 0.07  | 0.86 (0.49-1.49)           | 0.57   |
| Gold mining village | 0.52 (0.25-1.06)                        | 0.07   | 0.07 (0.01-0.61)                        | 0.02  | 1.32 (0.70-2.49)                                                         | 0.37  | 0.76 (0.44-1.31)           | 0.31   |
| Maternal age        | 1.00 (0.97-1.04)                        | 0.83   | 1.00 (0.93-1.07)                        | 0.89  | 1.01 (0.97-1.05)                                                         | 0.55  | 1.03 (1.00-1.06)           | 0.08   |
| Married mother      | 0.35 (0.12-0.98)                        | 0.05   | 0.79 (0.15-4.34)                        | 0.78  | 0.78 (0.38-1.60)                                                         | 0.49  | 1.00 (0.50-1.98)           | 0.99   |
| Refugee             | 0.43 (0.17-1.10)                        | 0.08   | 1.08 (0.23-5.00)                        | 0.92  | 0.46 (0.19-1.10)                                                         | 0.08  | 0.53 (0.25-1.11)           | 0.09   |
| Maternal Education  |                                         |        |                                         |       |                                                                          |       |                            |        |
| None                | Ref.                                    | Ref.   | Ref.                                    | Ref.  | Ref.                                                                     | Ref.  | Ref.                       | Ref.   |
| Primary             | 0.66 (0.38-1.15)                        | 0.14   | 1.25 (0.30-5.19)                        | 0.75  | 1.90 (0.95-3.81)                                                         | 0.07  | 1.42 (0.84-2.39)           | 0.19   |
| Any Secondary       | 0.72 (0.31-1.68)                        | 0.44   | 2.47 (0.50-12.13)                       | 0.25  | 3.50 (1.27-9.63)                                                         | 0.02  | 0.92 (0.44-1.94)           | 0.83   |
| Child's Age         |                                         |        |                                         |       |                                                                          |       |                            |        |
| <1 years            | Ref.                                    | Ref.   | Ref.                                    | Ref.  | Ref.                                                                     | Ref.  |                            |        |
| 1-2 years           | 2.93 (1.30-6.56)                        | 0.01   | 0.25 (0.04-1.54)                        | 0.13  | 3.50 (1.57-7.81)                                                         | 0.003 | Ref.                       | Ref.   |
| 2-3 years           | 2.92 (1.26-6.75)                        | 0.01   | 0.61 (0.14-2.73)                        | 0.51  | 1.67 (0.71-3.96)                                                         | 0.23  | 1.75 (0.94-3.27)           | 0.08   |
| 3-4 years           | 2.90 (1.27-6.59)                        | 0.01   | 0.55 (0.11-2.81)                        | 0.46  | 2.24 (0.90-5.56)                                                         | 0.08  | 2.25 (1.20-4.24)           | 0.01   |
| 4-5 years           | 1.70 (0.77-3.74)                        | 0.18   | 0.69 (0.17-2.80)                        | 0.59  | 1.27 (0.57-2.82)                                                         | 0.55  | 2.16 (1.21-3.84)           | 0.01   |
| Female child        | 0.95 (0.62-1.46)                        | 0.81   | 0.62 (0.23-1.67)                        | 0.33  | 1.00 (0.59-1.70)                                                         | 1.00  | 0.91 (0.58-1.44)           | 0.69   |

Abbreviations. ARI: Acute respiratory infection. HCW: Healthcare worker.

**Table s4. Maternal Health Service Utilization by Distance Quartile: Robustness Checks**

|                                                    | <u>Antenatal Clinic Visit 1+</u> |         | <u>Antenatal Clinic Visit 4+</u> |         | <u>Facility-Based Delivery</u> |        | <u>PNC from a Formal Healthcare Worker</u> |        | <u>Full Maternal Cascade</u> |         |
|----------------------------------------------------|----------------------------------|---------|----------------------------------|---------|--------------------------------|--------|--------------------------------------------|--------|------------------------------|---------|
|                                                    | Full Model                       |         | Full Model                       |         | Full Model                     |        | Full Model                                 |        | Full Model                   |         |
|                                                    | Odds Ratio<br>(95% CI)           | p       | Odds Ratio<br>(95% CI)           | p       | Odds Ratio<br>(95% CI)         | p      | Odds Ratio<br>(95% CI)                     | p      | Odds Ratio<br>(95% CI)       | p       |
| <b>Main Analysis</b>                               |                                  |         |                                  |         |                                |        |                                            |        |                              |         |
| Closest                                            | Ref.                             | Ref.*** | Ref.                             | Ref.*** | Ref.                           | Ref.*  | Ref.                                       | Ref.*  | Ref.                         | Ref.*** |
| Second                                             | 0.29<br>(0.13-0.67)              | 0.005   | 0.57<br>(0.32-1.00)              | 0.05    | 1.15<br>(0.72-1.84)            | 0.53   | 1.17<br>(0.73-1.87)                        | 0.51   | 1.03<br>(0.62-1.70)          | 0.90    |
| Third                                              | 0.23<br>(0.08-0.66)              | 0.008   | 0.57<br>(0.30-1.08)              | 0.08    | 1.63<br>(0.89-3.00)            | 0.11   | 1.37<br>(0.72-2.58)                        | 0.32   | 0.98<br>(0.47-2.06)          | 0.96    |
| Farthest                                           | 0.04<br>(0.02-0.09)              | <0.001  | 0.13<br>(0.07-0.23)              | <0.001  | 0.41<br>(0.22-0.76)            | 0.006  | 0.44<br>(0.24-0.80)                        | 0.009  | 0.18<br>(0.08-0.40)          | <0.001  |
| <b>Excluding Refugees</b>                          |                                  |         |                                  |         |                                |        |                                            |        |                              |         |
| Closest                                            | Ref.                             | Ref.*** | Ref.                             | Ref.*** | Ref.                           | Ref.*  | Ref.                                       | Ref.*  | Ref.                         | Ref.**  |
| Second                                             | 0.30<br>(0.13-0.69)              | 0.007   | 0.55<br>(0.32-0.97)              | 0.04    | 1.10<br>(0.69-1.78)            | 0.67   | 1.15<br>(0.70-1.87)                        | 0.57   | 1.05<br>(0.63-1.76)          | 0.83    |
| Third                                              | 0.24<br>(0.08-0.72)              | 0.01    | 0.59<br>(0.31-1.10)              | 0.10    | 1.58<br>(0.83-2.99)            | 0.16   | 1.45<br>(0.75-2.80)                        | 0.32   | 1.07<br>(0.51-2.23)          | 0.96    |
| Farthest                                           | 0.04<br>(0.02-0.11)              | <0.001  | 0.08<br>(0.04-0.17)              | <0.001  | 0.31<br>(0.15-0.63)            | 0.002  | 0.33<br>(0.15-0.72)                        | 0.007  | 0.11<br>(0.04-0.37)          | 0.001   |
| <b>Excluding Gold Mining Villages</b>              |                                  |         |                                  |         |                                |        |                                            |        |                              |         |
| Closest                                            | Ref.                             | Ref.*** | Ref.                             | Ref.*** | Ref.                           | Ref.** | Ref.                                       | Ref.*  | Ref.                         | Ref.*** |
| Second                                             | 0.33<br>(0.14-0.76)              | 0.01    | 0.65<br>(0.37-1.14)              | 0.13    | 1.36<br>(0.88-2.12)            | 0.16   | 1.31<br>(0.83-2.07)                        | 0.24   | 1.02<br>(0.61-1.69)          | 0.95    |
| Third                                              | 0.54<br>(0.13-2.31)              | 0.40    | 0.62<br>(0.31-1.26)              | 0.18    | 1.30<br>(0.70-2.41)            | 0.40   | 1.56<br>(0.79-3.08)                        | 0.19   | 1.33<br>(0.63-2.81)          | 0.45    |
| Farthest                                           | 0.03<br>(0.01-0.07)              | <0.001  | 0.09<br>(0.05-0.19)              | <0.001  | 0.31<br>(0.16-0.61)            | 0.001  | 0.34<br>(0.17-0.68)                        | 0.03   | 0.14<br>(0.05-0.36)          | <0.001  |
| <b>Excluding Refugees and Gold Mining Villages</b> |                                  |         |                                  |         |                                |        |                                            |        |                              |         |
| Closest                                            | Ref.                             | Ref.*** | Ref.                             | Ref.*** | Ref.                           | Ref.** | Ref.                                       | Ref.** | Ref.                         | Ref.*** |
| Second                                             | 0.33<br>(0.14-0.78)              | 0.01    | 0.60<br>(0.35-1.06)              | 0.08    | 1.29<br>(0.83-2.02)            | 0.25   | 1.22<br>(0.76-1.96)                        | 0.39   | 1.01<br>(0.60-1.69)          | 0.98    |
| Third                                              | 0.52<br>(0.12-2.21)              | 0.35    | 0.58<br>(0.29-1.15)              | 0.12    | 1.19<br>(0.63-2.27)            | 0.58   | 1.46<br>(0.73-2.94)                        | 0.28   | 1.34<br>(0.63-2.84)          | 0.43    |
| Farthest                                           | 0.03<br>(0.01-0.07)              | <0.001  | 0.07<br>(0.03-0.15)              | <0.001  | 0.23<br>(0.10-0.51)            | 0.001  | 0.25<br>(0.10-0.59)                        | 0.03   | 0.11<br>(0.03-0.37)          | 0.001   |

Abbreviations. PNC: Postnatal care.

Test for trend across distance quartiles: \*p ≤ 0.05 \*\*p ≤ 0.01 \*\*\*p ≤ 0.001. Models control for all covariates in the main analysis.

| Table s5. Child Health Care Seeking from a Recommended Provider: Robustness Checks |                                  |         |                                  |      |                                                                   |      |                     |         |
|------------------------------------------------------------------------------------|----------------------------------|---------|----------------------------------|------|-------------------------------------------------------------------|------|---------------------|---------|
|                                                                                    | Fever Care Seeking from Facility |         | ARI Care Seeking from Formal HCW |      | Diarrhea Care Seeking from Formal or Informal Biomedical Provider |      | Deworming Treatment |         |
|                                                                                    | Full OR (95% CI)                 | p       | Full OR (95% CI)                 | p    | Full OR (95% CI)                                                  | p    | Full OR (95% CI)    | p       |
| <b>Main Analysis</b>                                                               |                                  |         |                                  |      |                                                                   |      |                     |         |
| Closest                                                                            | Ref.                             | Ref.*** | Ref.                             | Ref. | Ref.                                                              | Ref. | Ref.                | Ref.*** |
| Second                                                                             | 0.40 (0.18-0.89)                 | 0.03    | 0.55 (0.10-3.10)                 | 0.49 | 2.01 (0.86-4.71)                                                  | 0.11 | 1.31 (0.60-2.85)    | 0.49    |
| Third                                                                              | 0.15 (0.05-0.43)                 | 0.001   | 0.14 (0.00-5.43)                 | 0.28 | 1.80 (0.64-5.10)                                                  | 0.26 | 1.70 (0.66-4.40)    | 0.26    |
| Farthest                                                                           | 0.06 (0.03-0.33)                 | <0.001  | 0.05 (0.00-1.02)                 | 0.05 | 0.87 (0.35-2.17)                                                  | 0.76 | 0.16 (0.07-0.38)    | <0.001  |
| <b>Excluding Refugees</b>                                                          |                                  |         |                                  |      |                                                                   |      |                     |         |
| Closest                                                                            | Ref.                             | Ref.*** | Ref.                             | Ref. | Ref.                                                              | Ref. | Ref.                | Ref.*** |
| Second                                                                             | 0.40 (0.18-0.90)                 | 0.03    | 0.63 (0.10-3.93)                 | 0.61 | 1.75 (0.73-4.21)                                                  | 0.20 | 1.25 (0.58-2.68)    | 0.56    |
| Third                                                                              | 0.13 (0.04-0.42)                 | 0.001   | 0.17 (0.00-7.17)                 | 0.34 | 1.45 (0.48-4.45)                                                  | 0.50 | 1.82 (0.70-4.75)    | 0.21    |
| Farthest                                                                           | 0.13 (0.04-0.44)                 | 0.002   | 0.11 (0.00-3.04)                 | 0.18 | 0.74 (0.25-2.15)                                                  | 0.57 | 0.11 (0.05-0.24)    | <0.001  |
| <b>Excluding Gold Mining Villages</b>                                              |                                  |         |                                  |      |                                                                   |      |                     |         |
| Closest                                                                            | Ref.                             | Ref.*** | Ref.                             | Ref. | Ref.                                                              | Ref. | Ref.                | Ref.*** |
| Second                                                                             | 0.36 (0.16-0.85)                 | 0.02    | 0.77 (0.13-4.65)                 | 0.77 | 1.57 (0.64-3.86)                                                  | 0.31 | 1.26 (0.56-2.85)    | 0.56    |
| Third                                                                              | 0.17 (0.04-0.77)                 | 0.02    | 0.11 (0.00-11.90)                | 0.34 | 2.28 (0.53-9.82)                                                  | 0.26 | 4.31 (0.67-27.68)   | 0.12    |
| Farthest                                                                           | 0.12 (0.04-0.38)                 | 0.001   | 0.05 (0.00-1.30)                 | 0.07 | 0.64 (0.22-1.92)                                                  | 0.42 | 0.14 (0.06-0.31)    | <0.001  |
| <b>Excluding Refugees and Gold Mining Villages</b>                                 |                                  |         |                                  |      |                                                                   |      |                     |         |
| Closest                                                                            | Ref.                             | Ref.*** | Ref.                             | Ref. | Ref.                                                              | Ref. | Ref.                | Ref.*** |
| Second                                                                             | 0.37 (0.16-0.87)                 | 0.02    | 0.90 (0.13-6.12)                 | 0.91 | 1.35 (0.54-3.34)                                                  | 0.51 | 1.21 (0.55-2.65)    | 0.62    |
| Third                                                                              | 0.18 (0.04-0.79)                 | 0.03    | 0.13 (0.00-15.71)                | 0.39 | 1.94 (0.43-8.78)                                                  | 0.38 | 4.01 (0.57-28.1)    | 0.16    |
| Farthest                                                                           | 0.13 (0.04-0.46)                 | 0.002   | 0.11 (0.00-3.46)                 | 0.20 | 0.40 (0.12-1.35)                                                  | 0.14 | 0.10 (0.05-0.22)    | <0.001  |

Abbreviations. ARI: Acute respiratory infection. HCW: Healthcare worker.

Test for trend across distance quartiles: \*p ≤ 0.05 \*\*p ≤ 0.01 \*\*\*p ≤ 0.001. Models control for all covariates in the main analysis.
